# Supplementary material
Source: Elsevier journal article supplement (https://authors.library.caltech.edu/75211/5/mmc4.pdf)

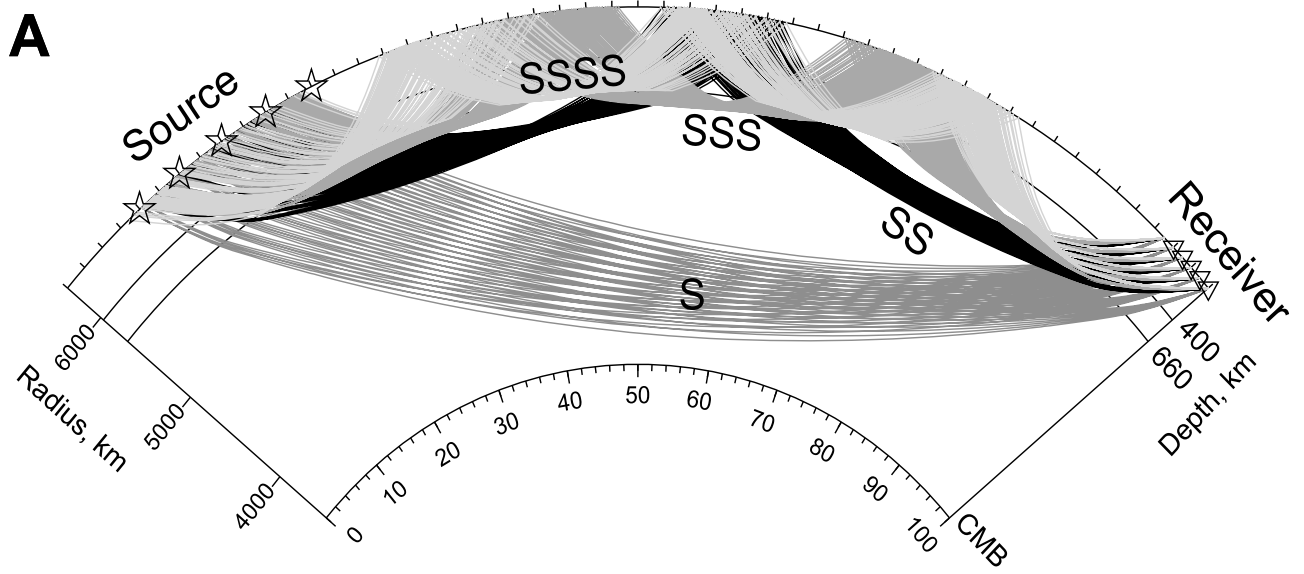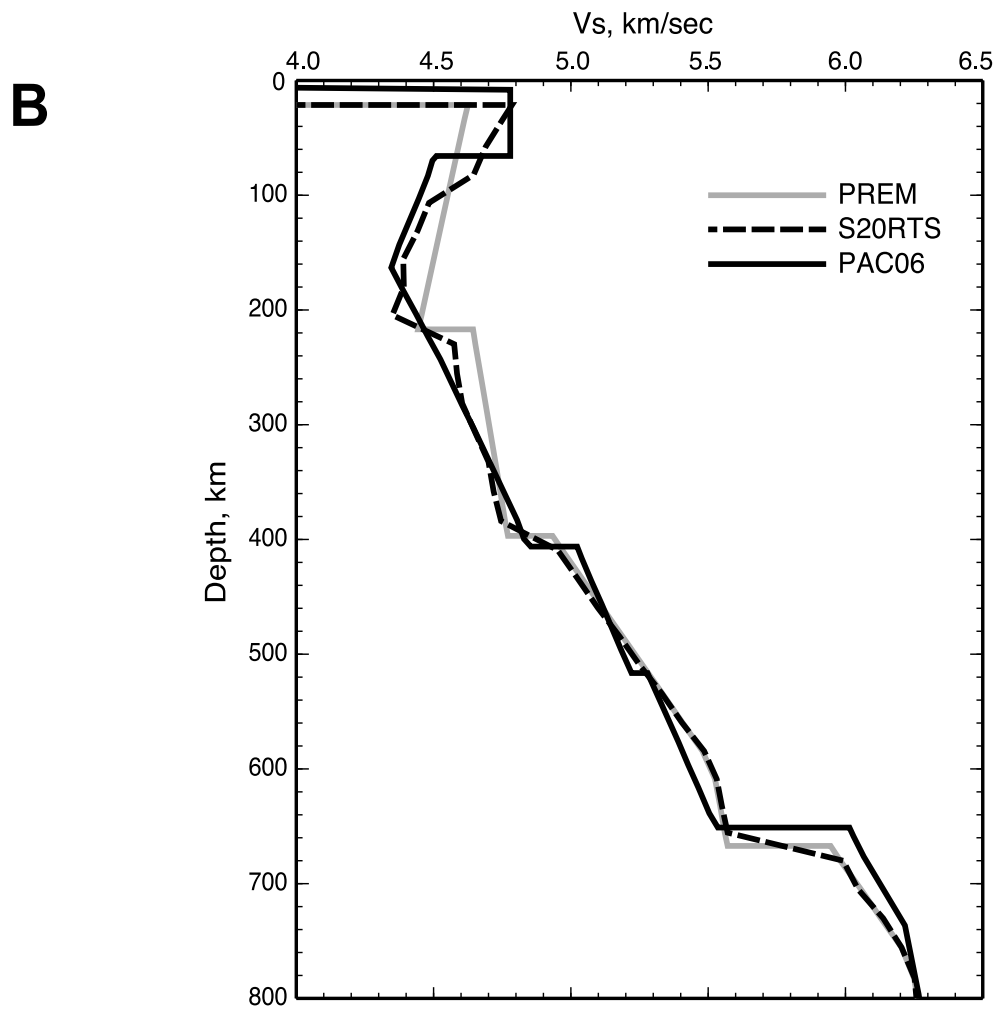

Figure S4

Supplement: mmc4 [file mmc4.pdf]
